# Supplementary material for: Large oncosomes mediate intercellular transfer of functional microRNA
Source: PubMed Central journal article supplement — Cell Cycle. 2013 Sep 23;12(22):3526–36. doi: 10.4161/cc.26539 (PMC3906338; doi:10.4161/cc.26539), 2013-09-23
Supplement: cc-12-3526-s01.pdf [file cc-12-3526-s01.pdf]

## **Supplemental Material to:**

**Large oncosomes mediate intercellular transfer of  
functional microRNA**

**Matteo Morello, Valentina R Minciacchi, Paola de Candia,  
Julie Yang, Edwin Posadas, Hyung Kim, Duncan Griffiths,  
Neil Bhowmick, Leland WK Chung, Paolo Gandellini,  
Michael R Freeman, Francesca Demichelis,  
and Dolores Di Vizio**

**Cell Cycle 2013; 12(22)**

**<http://dx.doi.org/10.4161/cc.26539>**

**<http://www.landesbioscience.com/journals/cc/article/26539>**

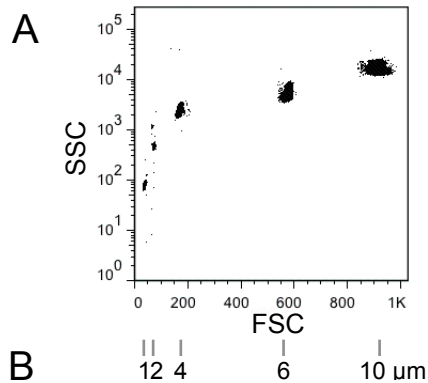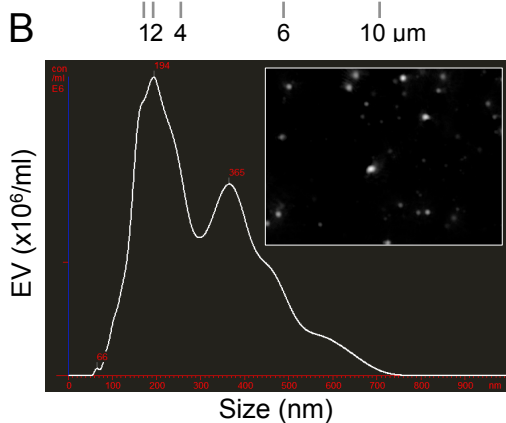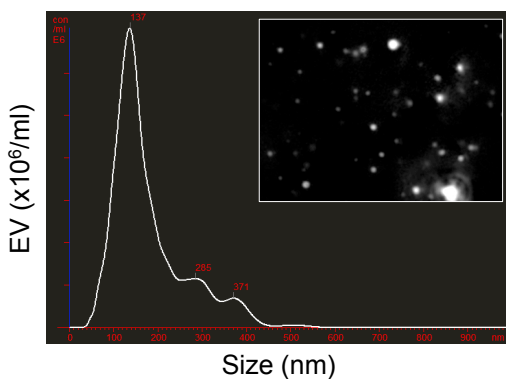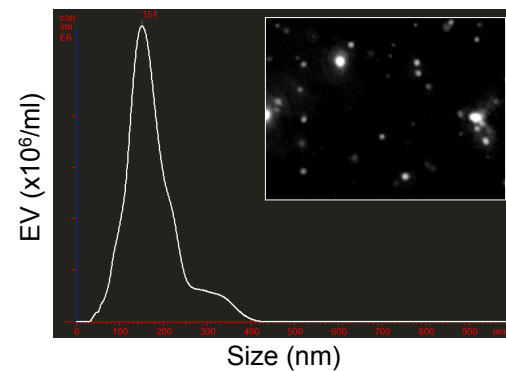

**Figure S1. (A)** One, 2, 4, 6 and 10  $\mu\text{m}$  size beads were used to set size gates for flow cytometry analysis. **(B)** Representative NTA images of size distribution of the particles obtained by centrifugation (10,000 g and 100,000g, top and bottom panel, respectively), and filtration (middle panel).

Pearson's correlation coefficient for EV and cell samples

|                | <b>A1: EV1</b> | <b>B1: EV2</b> | <b>A2: EV1</b> | <b>B2: EV2</b> |
|----------------|----------------|----------------|----------------|----------------|
| <b>A1: EV1</b> | 1              | 0.850          | 0.910          | 0.807          |
| <b>B1: EV2</b> | 0.850          | 1              | 0.849          | 0.801          |
| <b>A2: EV1</b> | 0.910          | 0.849          | 1              | 0.810          |
| <b>B2: EV2</b> | 0.807          | 0.801          | 0.810          | 1              |

  

|                   | <b>A1: RWPE-1</b> | <b>B1: RWPE-2</b> | <b>A2: RWPE-1</b> | <b>B2: RWPE-2</b> |
|-------------------|-------------------|-------------------|-------------------|-------------------|
| <b>A1: RWPE-1</b> | 1                 | 0.896             | 0.912             | 0.889             |
| <b>B1: RWPE-2</b> | 0.896             | 1                 | 0.914             | 0.893             |
| <b>A2: RWPE-1</b> | 0.912             | 0.914             | 1                 | 0.893             |
| <b>B2: RWPE-2</b> | 0.889             | 0.893             | 0.893             | 1                 |

**Figure S2.** Pearson's correlation coefficients. Technical replicates showed good signal correlation. Overall, EV2 replicates had the lowest correlation values.

| miRNA       | Fold change | miRNA     | Fold change |
|-------------|-------------|-----------|-------------|
| miR-1227    | 1.92        | let-7f-1* | 1.52        |
| miR-615-3p  | 1.79        | miR-448   | 1.51        |
| miR-541*    | 1.79        | miR-579   | 1.51        |
| miR-1224-3p | 1.77        | miR-16-2* | 1.50        |
| miR-548c-3p | 1.69        |           |             |
| miR-646     | 1.68        |           |             |
| let-7i*     | 1.63        |           |             |
| miR-1181    | 1.62        |           |             |
| miR-1204    | 1.60        |           |             |
| miR-519c-5p | 1.59        |           |             |
| miR-1253    | 1.59        |           |             |
| miR-506     | 1.59        |           |             |
| miR-518a-3p | 1.58        |           |             |
| miR-34c-5p  | 1.53        |           |             |

**Figure S3.** Tables showing miRNAs differentially expressed in EV2 compared to RWPE-2 cells. The table on the top shows miRNAs significantly (fold change > 1.5) higher in EV2 compared to RWPE-2 cells but non-significantly higher in EV1 compared to RWPE-1 cells; the table on the bottom shows miRNAs significantly (fold change ≤ 1.5) lower in EV2 compared to RWPE-2 cells but non-significantly lower in EV1 compared to RWPE-1 cells. The number of miRNAs lower in EV2 than in RWPE-2 cells is higher than the number of miRNAs higher in EV2 than in RWPE-2 cells.

| miRNA      | Fold change | miRNA      | Fold change | miRNA      | Fold change |
|------------|-------------|------------|-------------|------------|-------------|
| miR-1827   | -5.91       | miR-708    | -1.76       | let-7a*    | -1.84       |
| miR-599    | -3.20       | miR-92a    | -1.76       | miR-200c   | -1.81       |
| miR-548f   | -3.14       | miR-497*   | -1.73       | miR-342-5p | -1.80       |
| miR-620    | -3.09       | miR-130a   | -1.71       | miR-23b    | -1.79       |
| miR-103    | -3.02       | miR-139-5p | -1.69       | miR-632    | -1.54       |
| miR-107    | -2.25       | miR-144*   | -1.69       | miR-339-5p | -1.53       |
| miR-340*   | -2.21       | miR-149    | -1.67       | miR-320c   | -1.51       |
| miR-1290   | -2.17       | miR-578    | -1.66       | miR-500    | -1.50       |
| miR-151-5p | -2.06       | miR-193b   | -1.65       | miR-191    | -1.50       |
| miR-22*    | -1.93       | miR-23a    | -1.65       |            |             |
| miR-320d   | -1.93       | miR-1274a  | -1.65       |            |             |
| let-7i     | -1.88       | miR-182    | -1.59       |            |             |
| miR-31*    | -1.87       | miR-152    | -1.58       |            |             |
| miR-603    | -1.85       | miR-423-3p | -1.54       |            |             |

A

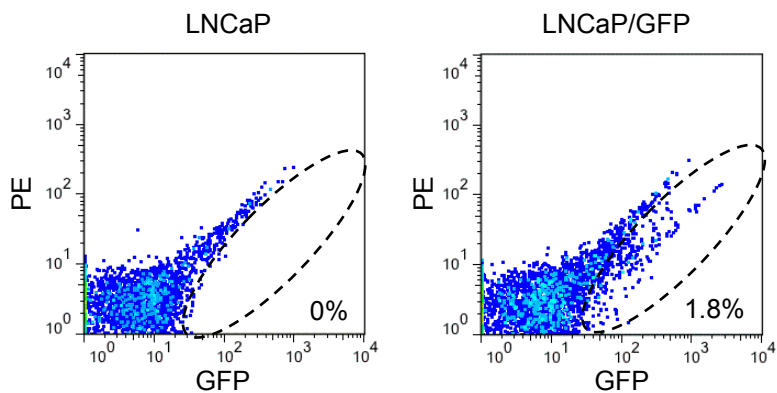

B

| miRNA       | Fold change |
|-------------|-------------|
| miR-22*     | 1.87        |
| miR-220a    | 1.79        |
| miR-548h    | 1.76        |
| miR-199b-5p | 1.62        |
| miR-301a    | 1.57        |
| miR-486-3p  | 1.57        |
| miR-377     | 1.54        |
| miR-621     | 1.52        |
| miR-518a-3p | -1.52       |
| miR-132*    | -1.52       |
| miR-378*    | -1.54       |
| miR-1261    | -1.55       |
| miR-302b    | -1.62       |
| miR-548c-3p | -1.74       |

**Figure S4.** (A) GFP-positive large EV were purified from the conditioned media of LNCaP/GFP cells and analyzed by flow cytometry. (B) Table showing miRNAs differentially expressed in RWPE-2 cells compared to RWPE-1 cells.
